# Supplementary material for: Long-Term Application of Bio-Compost Increased Soil Microbial Community Diversity and Altered Its Composition and Network
Source: MDPI journal article supplement (doi:10.3390/microorganisms10020462), 2022-02-17
Supplement: s1 [file s1]

## Supplementary Information

# Long-Term Application of Bio-Compost Increased Soil Microbial Community Diversity and Altered its Composition and Network

Xiayan Liu <sup>1</sup>, Yu Shi <sup>2</sup>, Lingyu Kong <sup>1</sup>, Lihong Tong <sup>3</sup>, Haoxuan Cao <sup>1</sup>, Hu Zhou <sup>1,\*</sup> and Yizhong Lv <sup>1,\*</sup>

- <sup>1</sup> Department of Soil and Water Sciences, College of Land Science and Technology, China Agricultural University, Beijing 100193, China; liuxiayan@cau.edu.cn (X.L.); 13427569158@163.com (L.K.); caohaoxuan21@163.com (H.C.)
- <sup>2</sup> State Key Laboratory of Crop Stress Adaptation and Improvement, School of Life Sciences, Henan University, Kaifeng 475004, China; yshi@henu.edu.cn
- <sup>3</sup> State Key Laboratory of Hydrosience and Engineering, Department of Hydraulic Engineering, Tsinghua University, Beijing 100084, China; tonglihong@mail.tsinghua.edu.cn
- \* Correspondence: zhouhu@cau.edu.cn (H.Z.); lyz@cau.edu.cn (Y.L.); Tel.: +86-010-62731890 (H.Z.); +86-010-62731431 (Y.L.)

**Table S1.** The soil background value before the experiment.

| Soil properties                                    | value  |
|----------------------------------------------------|--------|
| pH                                                 | 7.974  |
| soil organic matter (g kg <sup>-1</sup> )          | 13     |
| total phosphorus (g kg <sup>-1</sup> )             | 1.55   |
| total nitrogen (g kg <sup>-1</sup> )               | 0.84   |
| alkali-hydro nitrogen (mg kg <sup>-1</sup> )       | 55.62  |
| available phosphorus (mg kg <sup>-1</sup> )        | 4.71   |
| available potassium (mg kg <sup>-1</sup> )         | 102.30 |
| Soil bulk density (g cm <sup>-3</sup> )            | 1.510  |
| caption exchange capacity (cmol kg <sup>-1</sup> ) | 9.475  |

**Table S2.** Information of selected forward (F) and reverse (R) primers targeting different type of genes for qPCR

| Target gene        | Primer | Primer sequence        |
|--------------------|--------|------------------------|
| Bacterial 16S rRNA | 338F   | ACTCCTACGGGAGGCAGCAG   |
|                    | 806R   | GGACTACHVGGGTWTCTAAT   |
| Fungal ITS         | ITS1F  | CTTGGTCATTTAGAGGAAGTAA |
|                    | ITS2R  | TGCGTTCTTCATCGATGC     |

**Table S3.** The relative abundance of soil bacterial communities at different phylum levels under different fertilization treatments

|      | Acidobacteria | Proteobacteria | Actinobacteria | Chloroflexi | Gemmatimonadetes | Bacteroidetes | Planctomycetes | Nitrospirae | Firmicutes | Tectomicrobia | Latescibacteria | Saccharibacteria |
|------|---------------|----------------|----------------|-------------|------------------|---------------|----------------|-------------|------------|---------------|-----------------|------------------|
| CK   | 29.66a        | 25.50a         | 12.22a         | 9.51a       | 7.52a            | 2.77a         | 3.44a          | 2.40a       | 0.99b      | 0.89a         | 1.51a           | 1.02a            |
| CF   | 34.01a        | 25.20a         | 13.34a         | 8.64a       | 6.75a            | 2.57a         | 1.42b          | 1.74a       | 1.13b      | 1.47a         | 0.86ab          | 0.89a            |
| EMI  | 33.97a        | 26.21a         | 13.00a         | 9.29a       | 4.17c            | 3.28a         | 1.42b          | 1.59a       | 1.97a      | 1.54a         | 0.82ab          | 0.91a            |
| EMII | 32.62a        | 27.68a         | 12.78a         | 8.70a       | 5.47b            | 3.60a         | 1.24b          | 1.69a       | 1.75ab     | 1.51a         | 0.59b           | 0.72a            |

Values are means for triplicate replicates. Different lowercase letters indicate significant differences at  $p < 0.05$  based on the analysis of variance. CK: control treatment without any fertilizer; CF: chemical fertilizer; EMI: high level of biological compost; EMII: conventional level of biological compost.

**Table S4.** The relative abundance of soil fungal communities at different phylum levels under different fertilization treatments

|      | Ascomycota | Mortierellomycota | Basidiomycota |
|------|------------|-------------------|---------------|
| CK   | 42.34a     | 33.74a            | 4.00a         |
| CF   | 44.51a     | 24.98a            | 6.25a         |
| EMI  | 57.15a     | 21.28a            | 1.33a         |
| EMII | 48.72a     | 24.02a            | 1.80a         |

Values are means for triplicate replicates. Different lowercase letters indicate significant differences at  $p < 0.05$  based on the analysis of variance. CK: control treatment without any fertilizer; CF: chemical fertilizer; EMI: high level of biological compost; EMII: conventional level of biological compost.

**Table S5.** Microbial network parameters

|          | Network parameters             | Overall treatments | bio-compost | Non-bio-compost |
|----------|--------------------------------|--------------------|-------------|-----------------|
| Bacteria | Total nodes                    | 49                 | 47          | 48              |
|          | Positive links/Total links     | 82/123             | 59/97       | 76/117          |
|          | Negative links/Total links     | 41/123             | 38/97       | 41/117          |
|          | Average degree                 | 5.02               | 4.13        | 4.88            |
|          | Average clustering coefficient | 0.34               | 0.49        | 0.46            |
|          | Average betweenness centrality | 0.04               | 0.09        | 0.06            |
|          | Average closeness centrality   | 0.41               | 0.29        | 0.28            |
| Fungi    | Total nodes                    | 44                 | 46          | 48              |
|          | Positive links/Total links     | 46/83              | 43/83       | 49/92           |
|          | Negative links/Total links     | 37/83              | 40/83       | 43/92           |
|          | Average degree                 | 3.77               | 3.61        | 3.83            |
|          | Average clustering coefficient | 0.31               | 0.49        | 0.32            |
|          | Average betweenness centrality | 0.07               | 0.08        | 0.07            |

|  |                              |      |      |      |
|--|------------------------------|------|------|------|
|  | Average closeness centrality | 0.26 | 0.42 | 0.26 |
|--|------------------------------|------|------|------|

**Table S6.** KEGG Orthologies related to C, N and P cycles

| Gene/Enzyme               | KEGG Orthology Numbers |        |        |        |        |        |        |        |        |        |        |        |
|---------------------------|------------------------|--------|--------|--------|--------|--------|--------|--------|--------|--------|--------|--------|
| Related to the<br>C cycle | K01692                 | K01784 | K00626 | K01834 | K01652 | K01703 | K01491 | K01704 | K00128 | K01754 | K01738 | K00820 |
|                           | K04042                 | K01649 | K00845 | K00382 | K01961 | K00615 | K00074 | K01091 | K01647 | K01895 | K00249 | K01625 |
|                           | K01092                 | K01840 | K01179 | K00135 | K00123 | K00140 | K00100 | K00012 | K00104 | K00812 | K00688 | K00134 |
|                           | K01759                 | K01644 | K00240 | K01782 | K00948 | K00239 | K00640 | K01681 | K01187 | K00161 | K00850 | K01783 |
|                           | K01207                 | K00600 | K02437 | K00790 | K01689 | K00036 | K01803 | K00830 | K01653 | K00927 | K00075 | K00162 |
|                           | K00605                 | K00873 | K00658 | K00241 | K00024 | K00031 | K01809 | K00121 | K00616 | K05349 | K01711 | K01903 |
|                           | K01902                 | K12410 | K00001 | K00244 | K00627 | K00847 | K01963 | K03431 | K01791 | K00975 | K00963 | K01810 |
|                           | K01966                 | K01808 | K00248 | K00033 | K13953 | K00705 | K01006 | K01623 | K01057 | K07407 | K01512 | K00175 |
|                           | K00174                 | K01962 | K03821 | K01595 | K05350 | K01848 | K00124 | K00854 | K00925 | K00008 | K00965 | K00966 |
|                           | K07516                 | K00703 | K00851 | K01209 | K00831 | K01190 | K00117 | K01489 | K02446 | K01676 | K01858 | K01624 |

|                |        |        |        |        |        |        |        |        |        |        |        |        |
|----------------|--------|--------|--------|--------|--------|--------|--------|--------|--------|--------|--------|--------|
|                | K01619 | K01628 | K00261 | K00163 | K12308 | K01849 | K01181 | K01069 | K01835 | K00283 | K00282 | K01183 |
|                | K01785 | K00034 | K00297 | K01938 | K00114 | K00700 | K00164 | K02160 | K00971 | K01029 | K00754 | K07246 |
|                | K01188 | K00852 | K00978 | K00823 | K01007 | K07106 | K01679 | K13810 | K01443 | K02377 | K00849 | K14138 |
|                | K03781 | K00176 | K01433 | K00030 | K01638 | K01198 | K12454 | K07250 | K00029 | K00874 | K01816 | K01709 |
|                | K01654 | K00625 | K11261 | K01053 | K03737 | K01958 | K01640 | K05343 | K01079 | K01752 | K00010 | K01178 |
|                | K00131 | K00697 | K12452 | K01847 | K00050 | K11473 | K00027 | K09796 | K01087 | K00015 | K00101 | K01807 |
|                | K00242 | K00042 | K02564 | K00065 | K05606 | K01610 | K04072 | K11263 | K00929 | K01596 | K03335 | K01805 |
|                | K01965 | K01028 | K00190 | K00023 | K01812 | K07243 | K01637 | K03388 | K07406 | K03738 | K03738 | K00019 |
|                | K00156 | K01715 | K00281 | K00882 | K01677 | K01678 | K05973 | K01907 | K11472 | K03841 | K00886 | K01039 |
|                | K01040 | K01685 | K04073 | K00865 | K00177 | K01112 | K00064 | K12972 | K02793 | K01195 | K07404 | K01093 |
|                | K01684 | K00170 | K00895 | K01908 | K00172 | K01960 | K03336 | K00127 |        |        |        |        |
| Related to the | K00266 | K01915 | K01953 | K01673 | K00265 | K00605 | K00459 | K01745 | K00261 | K00363 | K00034 | K01760 |
| N cycle        | K01916 | K00262 | K01424 | K01744 | K02575 | K00285 | K00284 | K00362 | K00260 | K14155 | K00372 | K00366 |
|                | K02586 | K02588 | K01425 | K01758 | K02585 | K01428 |        |        |        |        |        | K02591 |
| Related to the | K00655 | K01524 | K01507 | K01507 | K01090 | K01091 | K03574 | K01092 | K01104 | K02036 | K06153 | K02037 |

|         |        |        |        |        |        |        |        |        |        |        |        |        |
|---------|--------|--------|--------|--------|--------|--------|--------|--------|--------|--------|--------|--------|
| P cycle | K02038 | K07636 | K07042 | K07024 | K01520 | K06217 | K01113 | K03820 | K03306 | K07053 | K03270 | K01512 |
|         | K00937 | K08296 | K00324 | K06881 | K07658 | K06949 | K02446 | K07315 | K04750 | K01095 | K03273 | K05946 |
|         | K06896 | K01078 | K02221 | K07657 | K01079 | K00325 | K03426 | K01087 | K06193 | K01077 | K01077 | K07313 |
|         | K03841 | K01112 | K01093 | K04486 | K01525 |        |        |        |        |        |        |        |

---



**Table S7.** The Pearson's correlation analysis between soil bacterial phyla and key metabolic pathways related to the C cycle

|                                             | Acidobacteria | Proteobacteria | Actinobacteria | Chloroflexi | Gemmatimonadetes | Bacteroidetes | Planctomycetes | Nitrospirae | Firmicutes | Tectomicrobia | Latescibacteria | Saccharibacteria |
|---------------------------------------------|---------------|----------------|----------------|-------------|------------------|---------------|----------------|-------------|------------|---------------|-----------------|------------------|
| Glycine, serine and threonine metabolism    | .734**        | -.762**        | -0.327         | 0.321       | -0.13            | -0.444        | -0.077         | 0.033       | -0.449     | -0.282        | 0.089           | -0.239           |
| Cysteine and methionine metabolism          | .827**        | -.798**        | -.876**        | 0.141       | 0.038            | 0.088         | 0.063          | -0.281      | -0.369     | -0.423        | 0.162           | 0.101            |
| Valine, leucine and isoleucine biosynthesis | 0.092         | -0.519         | -0.064         | .708**      | 0.308            | -.665*        | 0.569          | .748**      | -0.537     | -0.467        | .637*           | -0.495           |
| Arginine and proline metabolism             | 0.191         | 0.268          | 0.183          | -0.166      | -.837**          | 0.097         | -.714**        | -0.393      | .585*      | .722**        | -.619*          | -0.227           |
| Tryptophan metabolism                       | -0.188        | .645*          | 0.508          | -0.495      | -.621*           | 0.348         | -.778**        | -0.504      | .684*      | .719**        | -.775**         | 0.068            |
| Glycolysis / Gluconeogenesis                | -.932**       | .785**         | .734**         | -0.025      | 0.152            | 0.05          | 0.039          | 0.268       | 0.426      | 0.503         | 0.036           | -0.03            |
| Citrate cycle (TCA cycle)                   | 0.01          | -0.353         | -0.016         | 0.15        | .667*            | -0.226        | 0.43           | 0.378       | -.618*     | -.801**       | 0.378           | 0.07             |
| Pentose phosphate pathway                   | .712**        | -.881**        | -0.44          | 0.575       | -0.171           | -0.292        | 0.123          | -0.039      | -0.341     | -0.38         | 0.241           | -0.049           |
| Pentose and glucuronate interconversions    | 0.421         | 0.141          | -0.153         | -0.44       | -.795**          | .599*         | -.816**        | -.905**     | .604*      | 0.5           | -.802**         | 0.312            |
| Fructose and mannose metabolism             | .973**        | -.841**        | -0.563         | 0.132       | -0.311           | -0.152        | -0.191         | -0.382      | -0.341     | -0.347        | -0.147          | 0.082            |
| Galactose metabolism                        | .834**        | -.714**        | -0.514         | 0.007       | -0.229           | 0.102         | -0.284         | -.659*      | -0.178     | -0.224        | -0.244          | 0.43             |
| Ascorbate and aldarate metabolism           | -0.527        | .846**         | 0.494          | -0.322      | -0.475           | 0.299         | -0.477         | -0.162      | .771**     | .864**        | -0.433          | -0.148           |
| Starch and sucrose metabolism               | -0.23         | 0.392          | 0.169          | -0.254      | -0.25            | 0.393         | -0.394         | -0.53       | 0.503      | .594*         | -0.351          | 0.46             |
| Amino sugar and nucleotide sugar metabolism | .933**        | -.910**        | -.685*         | 0.175       | -0.1             | -0.119        | -0.039         | -0.368      | -0.432     | -0.425        | 0.019           | 0.193            |
| Inositol phosphate metabolism               | -0.392        | .585*          | .672*          | -0.196      | -0.463           | 0.143         | -0.54          | -0.337      | .602*      | .677*         | -0.558          | 0.218            |
| Pyruvate metabolism                         | -.799**       | .844**         | 0.561          | -0.065      | -0.12            | 0.114         | -0.119         | 0.212       | .629*      | .761**        | -0.027          | -0.287           |
| Glyoxylate and dicarboxylate metabolism     | -0.135        | .580*          | 0.43           | -0.271      | -.690*           | 0.119         | -.671*         | -0.162      | .608*      | .698*         | -.622*          | -0.333           |
| Propanoate metabolism                       | 0.499         | 0.041          | 0.016          | -0.324      | -.800**          | 0.283         | -.874**        | -.659*      | 0.48       | 0.444         | -.725**         | -0.067           |
| Butanoate metabolism                        | -0.46         | .765**         | .715**         | -0.327      | -0.49            | 0.157         | -.577*         | -0.18       | .649*      | .714**        | -0.575          | -0.089           |
| C5-Branched dibasic acid metabolism         | -0.243        | -0.246         | 0.138          | .723**      | 0.397            | -.642*        | .647*          | .914**      | -0.395     | -0.346        | .724**          | -0.571           |
| Methane metabolism                          | -.784**       | .913**         | .642*          | -0.169      | -0.213           | 0.161         | -0.23          | 0.164       | .664*      | .747**        | -0.195          | -0.27            |
| Carbon fixation in photosynthetic organisms | 0.051         | -0.561         | -0.379         | 0.448       | .745**           | -0.337        | .793**         | 0.534       | -.712**    | -.725**       | .778**          | -0.01            |

|                                         |        |         |        |        |         |        |         |        |        |         |         |        |
|-----------------------------------------|--------|---------|--------|--------|---------|--------|---------|--------|--------|---------|---------|--------|
| Carbon fixation pathways in prokaryotes | .747** | -.903** | -.632* | 0.314  | 0.229   | -0.254 | 0.26    | 0.067  | -.630* | -.724** | 0.342   | -0.058 |
| ABC transporters                        | -0.528 | .722**  | .613*  | -0.041 | -0.49   | 0.023  | -0.383  | 0.055  | .677*  | .827**  | -0.328  | -0.311 |
| One carbon pool by folate               | -0.441 | -0.05   | -0.053 | 0.228  | .832**  | -0.133 | .807**  | .625*  | -0.453 | -.582*  | .754**  | 0      |
| Cyanoamino acid metabolism              | 0.325  | 0.176   | 0.252  | -0.328 | -.776** | 0.16   | -.848** | -0.556 | 0.407  | 0.455   | -.880** | 0.032  |

A value greater than zero represents a positive correlation, a value less than zero represents a negative correlation. The significant correlations are presented as asterisks (\*,  $p < 0.05$ ; \*\*,  $p < 0.01$ ).

**Table S8.** The Pearson's correlation analysis between soil bacterial phyla and key metabolic pathways related to the N cycle

|                                             | Acidobacteria | Proteobacteria | Actinobacteria | Chloroflexi | Gemmatimonadetes | Bacteroidetes | Planctomycetes | Nitrospirae | Firmicutes | Tectomicrobia | Latescibacteria | Saccharibacteria |
|---------------------------------------------|---------------|----------------|----------------|-------------|------------------|---------------|----------------|-------------|------------|---------------|-----------------|------------------|
| Alanine, aspartate and glutamate metabolism | 0.191         | -.682*         | -0.413         | 0.497       | .663*            | -0.412        | .710**         | 0.499       | -.671*     | -.658*        | .836**          | -0.153           |
| Glycine, serine and threonine metabolism    | .734**        | -.762**        | -0.327         | 0.321       | -0.13            | -0.444        | -0.077         | 0.033       | -0.449     | -0.282        | 0.089           | -0.239           |
| Cysteine and methionine metabolism          | .827**        | -.798**        | -.876**        | 0.141       | 0.038            | 0.088         | 0.063          | -0.281      | -0.369     | -0.423        | 0.162           | 0.101            |
| Arginine and proline metabolism             | 0.191         | 0.268          | 0.183          | -0.166      | -.837**          | 0.097         | -.714**        | -0.393      | .585*      | .722**        | -.619*          | -0.227           |
| Histidine metabolism                        | .895**        | -.886**        | -.669*         | 0.272       | -0.113           | -0.125        | 0.01           | -0.145      | -0.404     | -0.517        | 0.15            | -0.077           |
| Tyrosine metabolism                         | 0.18          | 0.407          | 0.067          | -.647*      | -.652*           | 0.529         | -.837**        | -.819**     | 0.574      | .615*         | -.879**         | 0.296            |
| Phenylalanine metabolism                    | -0.197        | .655*          | 0.489          | -0.469      | -.613*           | 0.257         | -.746**        | -0.444      | .629*      | .771**        | -.795**         | 0.041            |
| Tryptophan metabolism                       | -0.188        | .645*          | 0.508          | -0.495      | -.621*           | 0.348         | -.778**        | -0.504      | .684*      | .719**        | -.775**         | 0.068            |
| Pentose phosphate pathway                   | .712**        | -.881**        | -0.44          | 0.575       | -0.171           | -0.292        | 0.123          | -0.039      | -0.341     | -0.38         | 0.241           | -0.049           |
| C5-Branched dibasic acid metabolism         | -0.243        | -0.246         | 0.138          | .723**      | 0.397            | -.642*        | .647*          | .914**      | -0.395     | -0.346        | .724**          | -0.571           |
| Nitrogen metabolism                         | .583*         | -0.007         | -0.416         | -0.359      | -.727**          | 0.537         | -.780**        | -.772**     | 0.534      | 0.496         | -.602*          | 0.007            |
| One carbon pool by folate                   | -0.441        | -0.05          | -0.053         | 0.228       | .832**           | -0.133        | .807**         | .625*       | -0.453     | -.582*        | .754**          | 0                |
| Nicotinate and nicotinamide metabolism      | .614*         | -.863**        | -0.293         | 0.487       | 0.15             | -0.475        | 0.26           | 0.271       | -.606*     | -.704*        | 0.366           | -0.219           |
| Taurine and hypotaurine metabolism          | .851**        | -0.358         | -0.529         | -0.371      | -0.521           | 0.274         | -.651*         | -.735**     | 0.047      | 0.137         | -.591*          | 0.14             |
| Selenocompound metabolism                   | .982**        | -.828**        | -.599*         | 0.04        | -0.24            | -0.061        | -0.225         | -0.455      | -0.38      | -0.403        | -0.21           | 0.196            |

|                                           |        |        |        |        |         |        |         |        |        |        |         |        |
|-------------------------------------------|--------|--------|--------|--------|---------|--------|---------|--------|--------|--------|---------|--------|
| Cyanoamino acid metabolism                | 0.325  | 0.176  | 0.252  | -0.328 | -.776** | 0.16   | -.848** | -0.556 | 0.407  | 0.455  | -.880** | 0.032  |
| D-Glutamine and D-glutamate metabolism    | -0.189 | -0.385 | -0.135 | 0.393  | .866**  | -0.392 | .820**  | .622*  | -.680* | -.697* | .823**  | 0.02   |
| Purine metabolism                         | -0.035 | -0.536 | -0.224 | 0.543  | .721**  | -0.434 | .815**  | .646*  | -.622* | -.681* | .893**  | -0.174 |
| Two-component system                      | -.612* | .900** | 0.171  | -0.469 | -0.136  | 0.539  | -0.228  | -0.083 | .689*  | .670*  | -0.173  | -0.122 |
| Chloroalkane and chloroalkene degradation | -0.299 | .752** | 0.454  | -0.445 | -.623*  | 0.374  | -.702*  | -0.397 | .764** | .855** | -.685*  | -0.059 |
| Aminobenzoate degradation                 | -0.412 | .718** | .707*  | -0.341 | -0.506  | 0.082  | -0.57   | -0.201 | .590*  | .729** | -.602*  | -0.056 |
| Atrazine degradation                      | -0.392 | .674*  | 0.54   | -0.176 | -0.549  | 0.018  | -0.457  | -0.089 | .616*  | .842** | -0.471  | -0.21  |

A value greater than zero represents a positive correlation, a value less than zero represents a negative correlation. The significant correlations are presented as asterisks (\*,  $p < 0.05$ ; \*\*,  $p < 0.01$ ).

**Table S9.** The Pearson's correlation analysis between soil bacterial phyla and key metabolic pathways related to the P cycle

|                                             | Acidobacteria | Proteobacteria | Actinobacteria | Chloroflexi | Gemmatimonadetes | Bacteroidetes | Planctomycetes | Nitrospirae | Firmicutes | Tectomicrobia | Latescibacteria | Saccharibacteria |
|---------------------------------------------|---------------|----------------|----------------|-------------|------------------|---------------|----------------|-------------|------------|---------------|-----------------|------------------|
| Glycine, serine and threonine metabolism    | .734**        | -.762**        | -0.327         | 0.321       | -0.13            | -0.444        | -0.077         | 0.033       | -0.449     | -0.282        | 0.089           | -0.239           |
| Cysteine and methionine metabolism          | .827**        | -.798**        | -.876**        | 0.141       | 0.038            | 0.088         | 0.063          | -0.281      | -0.369     | -0.423        | 0.162           | 0.101            |
| Histidine metabolism                        | .895**        | -.886**        | -.669*         | 0.272       | -0.113           | -0.125        | 0.01           | -0.145      | -0.404     | -0.517        | 0.15            | -0.077           |
| Streptomycin biosynthesis                   | 0.406         | -.871**        | -0.391         | .583*       | 0.472            | -0.531        | .605*          | 0.386       | -.744**    | -.712**       | .670*           | -0.048           |
| Glycolysis / Gluconeogenesis                | -.932**       | .785**         | .734**         | -0.025      | 0.152            | 0.05          | 0.039          | 0.268       | 0.426      | 0.503         | 0.036           | -0.03            |
| Fructose and mannose metabolism             | .973**        | -.841**        | -0.563         | 0.132       | -0.311           | -0.152        | -0.191         | -0.382      | -0.341     | -0.347        | -0.147          | 0.082            |
| Galactose metabolism                        | .834**        | -.714**        | -0.514         | 0.007       | -0.229           | 0.102         | -0.284         | -.659*      | -0.178     | -0.224        | -0.244          | 0.43             |
| Starch and sucrose metabolism               | -0.23         | 0.392          | 0.169          | -0.254      | -0.25            | 0.393         | -0.394         | -0.53       | 0.503      | .594*         | -0.351          | 0.46             |
| Amino sugar and nucleotide sugar metabolism | .933**        | -.910**        | -.685*         | 0.175       | -0.1             | -0.119        | -0.039         | -0.368      | -0.432     | -0.425        | 0.019           | 0.193            |
| Pyruvate metabolism                         | -.799**       | .844**         | 0.561          | -0.065      | -0.12            | 0.114         | -0.119         | 0.212       | .629*      | .761**        | -0.027          | -0.287           |
| Glyoxylate and dicarboxylate metabolism     | -0.135        | .580*          | 0.43           | -0.271      | -.690*           | 0.119         | -.671*         | -0.162      | .608*      | .698*         | -.622*          | -0.333           |
| Oxidative phosphorylation                   | 0.36          | -0.548         | -0.57          | 0.2         | 0.458            | 0.001         | 0.426          | 0.309       | -0.534     | -.821**       | 0.489           | -0.136           |
| Methane metabolism                          | -.784**       | .913**         | .642*          | -0.169      | -0.213           | 0.161         | -0.23          | 0.164       | .664*      | .747**        | -0.195          | -0.27            |
| Carbon fixation in photosynthetic organisms | 0.051         | -0.561         | -0.379         | 0.448       | .745**           | -0.337        | .793**         | 0.534       | -.712**    | -.725**       | .778**          | -0.01            |
| RNA degradation                             | -0.211        | 0.016          | -0.284         | 0.061       | 0.445            | 0.274         | 0.556          | 0.383       | -0.167     | -.633*        | 0.505           | -0.029           |
| Lipopolysaccharide biosynthesis             | .684*         | -.776**        | -.831**        | 0.236       | 0.212            | -0.085        | 0.324          | 0.054       | -0.491     | -0.549        | 0.424           | -0.142           |
| Glycerolipid metabolism                     | -0.179        | 0.4            | 0.065          | -0.242      | -0.408           | 0.54          | -0.375         | -0.52       | .731**     | .634*         | -0.187          | 0.175            |
| Glycerophospholipid metabolism              | 0.435         | -0.544         | -.580*         | 0.206       | 0.258            | -0.053        | 0.268          | 0.26        | -0.328     | -0.449        | 0.575           | -0.451           |
| Arachidonic acid metabolism                 | 0.336         | 0.119          | -0.182         | -.631*      | -0.285           | 0.533         | -.695*         | -.876**     | 0.254      | 0.348         | -.766**         | 0.497            |
| Sphingolipid metabolism                     | -0.391        | .704*          | -0.028         | -0.41       | -0.265           | .861**        | -0.27          | -0.306      | .750**     | 0.415         | -0.208          | 0.049            |
| ABC transporters                            | -0.528        | .722**         | .613*          | -0.041      | -0.49            | 0.023         | -0.383         | 0.055       | .677*      | .827**        | -0.328          | -0.311           |
| Phosphotransferase system (PTS)             | -0.305        | 0.476          | -0.251         | -0.403      | 0.107            | 0.453         | -0.012         | -0.145      | 0.435      | 0.453         | 0.141           | -0.05            |

|                                        |        |         |        |        |        |        |        |        |        |         |        |        |
|----------------------------------------|--------|---------|--------|--------|--------|--------|--------|--------|--------|---------|--------|--------|
| Bacterial secretion system             | -0.459 | 0.072   | -0.183 | 0.133  | .763** | 0.009  | .778** | .584*  | -0.305 | -0.429  | .741** | -0.107 |
| Riboflavin metabolism                  | -.620* | 0.127   | 0.251  | 0.369  | .728** | -0.403 | .716** | .917** | -0.348 | -0.314  | .754** | -0.41  |
| Vitamin B6 metabolism                  | .747** | -.909** | -0.512 | 0.346  | 0.133  | -0.194 | 0.166  | -0.026 | -.579* | -.734** | 0.247  | 0.051  |
| Nicotinate and nicotinamide metabolism | .614*  | -.863** | -0.293 | 0.487  | 0.15   | -0.475 | 0.26   | 0.271  | -.606* | -.704*  | 0.366  | -0.219 |
| Porphyrin and chlorophyll metabolism   | -.611* | .932**  | 0.448  | -0.367 | -0.33  | 0.4    | -0.449 | -0.072 | .767** | .819**  | -0.375 | -0.238 |
| Phosphonate and phosphinate metabolism | -.660* | .944**  | .619*  | -0.427 | -0.272 | 0.387  | -0.441 | -0.114 | .663*  | .629*   | -0.519 | -0.004 |
| Purine metabolism                      | -0.035 | -0.536  | -0.224 | 0.543  | .721** | -0.434 | .815** | .646*  | -.622* | -.681*  | .893** | -0.174 |
| Pyrimidine metabolism                  | 0.37   | -.751** | -0.54  | 0.393  | 0.57   | -0.228 | .600*  | 0.321  | -.676* | -.825** | .654*  | -0.007 |
| Two-component system                   | -.612* | .900**  | 0.171  | -0.469 | -0.136 | 0.539  | -0.228 | -0.083 | .689*  | .670*   | -0.173 | -0.122 |
| mRNA surveillance pathway              | -0.011 | 0.192   | 0.086  | -0.079 | -0.146 | 0.077  | -0.387 | -0.305 | 0.138  | 0.344   | -.601* | 0.302  |
| Peroxisome                             | -0.447 | .852**  | 0.515  | -0.516 | -0.44  | 0.407  | -.631* | -0.338 | .735** | .783**  | -.625* | -0.003 |
| Aminobenzoate degradation              | -0.412 | .718**  | .707*  | -0.341 | -0.506 | 0.082  | -0.57  | -0.201 | .590*  | .729**  | -.602* | -0.056 |

A value greater than zero represents a positive correlation, a value less than zero represents a negative correlation. The significant correlations are presented as asterisks (\*,  $p < 0.05$ ; \*\*,  $p < 0.01$ ).

**Table S10.** The Pearson’s correlation analysis between soil bacterial genera and key metabolic pathways related to the C cycle

|                                             | RB41   | Sphingomonas | H16    | Acidobacteria_bacterium_WX27 | Skermanella | Lysobacter | Steroidobacter | Acidibacter | Gaiella | Bacillus | AKYG587 | Nocardioides | Nitrospira | Pseudarthrobacter | CandidatusEntotheonella | Haliangium | Streptomyces | DS-100 |
|---------------------------------------------|--------|--------------|--------|------------------------------|-------------|------------|----------------|-------------|---------|----------|---------|--------------|------------|-------------------|-------------------------|------------|--------------|--------|
| Glycine, serine and threonine metabolism    | 0.524  | -0.522       | -0.077 | 0.413                        | -0.284      | -0.128     | -0.318         | -0.354      | -0.228  | -0.412   | -0.186  | -0.258       | -0.37      | 0.018             | -0.348                  | 0.076      | -0.385       | 0.419  |
| Cysteine and methionine metabolism          | .784** | -0.148       | -0.141 | 0.381                        | -0.275      | -0.057     | -0.058         | -0.245      | -.654*  | -0.513   | 0.143   | -0.545       | -0.463     | -0.089            | -0.357                  | -0.244     | -.764**      | 0.303  |
| Valine, leucine and isoleucine biosynthesis | -0.07  | -.664*       | 0.524  | -0.148                       | -.611*      | 0.367      | -.684*         | -0.472      | 0.146   | -0.451   | 0.421   | -0.238       | -0.14      | -0.544            | -0.495                  | 0.531      | -0.16        | -0.194 |
| Arginine and proline metabolism             | -0.032 | -0.312       | -0.513 | 0.553                        | .760**      | -.660*     | .623*          | 0.491       | 0.034   | .582*    | -.842** | 0.063        | 0.296      | 0.421             | .604*                   | -0.248     | 0.241        | 0.351  |
| Tryptophan metabolism                       | -0.252 | 0.232        | -0.523 | 0.339                        | .747**      | -0.471     | .663*          | 0.525       | 0.279   | .689*    | -.790** | 0.472        | 0.353      | 0.516             | .593*                   | -0.383     | 0.522        | 0.214  |
| Glycolysis / Gluconeogenesis                | -.634* | 0.118        | 0.29   | -0.53                        | 0.336       | 0.133      | 0.066          | 0.408       | 0.543   | .580*    | 0.009   | 0.429        | .641*      | 0.045             | 0.503                   | 0.106      | .724**       | -.583* |
| Citrate cycle (TCA cycle)                   | -0.01  | 0.337        | 0.322  | -0.224                       | -.839**     | 0.565      | -.657*         | -.658*      | 0.182   | -0.555   | 0.528   | 0.254        | -0.401     | -0.348            | -.838**                 | 0.108      | -0.049       | -0.027 |
| Pentose phosphate pathway                   | 0.559  | -0.546       | -0.205 | 0.453                        | -0.339      | -0.115     | -0.214         | -0.418      | -0.427  | -0.47    | 0.039   | -0.238       | -0.515     | -0.341            | -0.431                  | -0.088     | -0.538       | 0.097  |

|                                             |        |        |         |         |         |        |         |        |        |        |         |        |        |        |         |        |        |        |
|---------------------------------------------|--------|--------|---------|---------|---------|--------|---------|--------|--------|--------|---------|--------|--------|--------|---------|--------|--------|--------|
| Pentose and glucuronate interconversions    | 0.301  | 0.165  | -.816** | .723**  | .699*   | -.633* | .845**  | 0.456  | -0.291 | 0.407  | -.757** | 0.058  | -0.014 | 0.43   | 0.445   | -.650* | -0.112 | 0.376  |
| Fructose and mannose metabolism             | .728** | -0.155 | -0.524  | .664*   | -0.196  | -0.374 | -0.012  | -0.432 | -0.569 | -0.472 | -0.201  | -0.184 | -.670* | 0.06   | -0.435  | -0.268 | -0.557 | .633*  |
| Galactose metabolism                        | .856** | 0.219  | -.710** | .598*   | -0.032  | -0.485 | 0.15    | -0.331 | -.687* | -0.323 | -0.191  | 0.054  | -.636* | 0.21   | -0.306  | -.604* | -0.423 | 0.531  |
| Ascorbate and aldarate metabolism           | -0.492 | -0.066 | -0.1    | -0.026  | .813**  | -0.292 | .599*   | .761** | 0.346  | .825** | -0.548  | 0.15   | .704*  | 0.345  | .864**  | -0.073 | 0.541  | -0.17  |
| Starch and sucrose metabolism               | 0.133  | 0.287  | -0.338  | -0.039  | .641*   | -0.407 | 0.497   | 0.555  | -0.146 | 0.552  | -0.348  | 0.203  | 0.321  | 0.458  | .640*   | -0.441 | 0.239  | -0.125 |
| Amino sugar and nucleotide sugar metabolism | .853** | -0.058 | -0.426  | 0.505   | -0.273  | -0.298 | -0.094  | -0.452 | -.688* | -0.542 | -0.003  | -0.238 | -.676* | 0.038  | -0.465  | -0.316 | -.619* | 0.53   |
| Inositol phosphate metabolism               | -0.276 | 0.228  | -0.456  | 0.102   | .658*   | -0.49  | 0.461   | 0.414  | 0.269  | .695*  | -.586*  | .631*  | 0.343  | 0.421  | 0.551   | -0.322 | .657*  | -0.017 |
| Pyruvate metabolism                         | -.610* | -0.143 | 0.262   | -0.378  | .607*   | -0.039 | 0.317   | .685*  | 0.45   | .783** | -0.21   | 0.177  | .839** | 0.129  | .781**  | 0.056  | .674*  | -0.467 |
| Glyoxylate and dicarboxylate metabolism     | -0.411 | -0.233 | -0.24   | 0.355   | .677*   | -0.381 | 0.529   | 0.568  | 0.422  | .676*  | -.790** | 0.152  | 0.501  | 0.358  | .590*   | -0.055 | 0.436  | 0.205  |
| Propanoate metabolism                       | 0.219  | -0.005 | -.734** | .797**  | 0.546   | -.590* | .654*   | 0.314  | -0.073 | 0.426  | -.916** | 0.28   | 0.012  | 0.421  | 0.271   | -.653* | 0.132  | 0.567  |
| Butanoate metabolism                        | -0.514 | 0.118  | -0.273  | 0.099   | .653*   | -0.322 | 0.487   | 0.513  | 0.491  | .750** | -.653*  | 0.541  | 0.502  | 0.376  | .587*   | -0.177 | .710** | 0.019  |
| C5-Branched dibasic acid metabolism         | -0.34  | -.640* | .689*   | -0.358  | -0.547  | 0.469  | -.680*  | -0.345 | 0.335  | -0.258 | 0.487   | -0.138 | 0.095  | -.604* | -0.359  | .592*  | 0.077  | -0.418 |
| Methane metabolism                          | -.708* | -0.111 | 0.195   | -0.271  | .617*   | -0.037 | 0.355   | .662*  | 0.558  | .770** | -0.31   | 0.203  | .795** | 0.152  | .751**  | 0.127  | .668*  | -0.4   |
| Carbon fixation in photosynthetic organisms | 0.198  | -0.146 | .601*   | -0.445  | -.785** | .581*  | -.735** | -0.53  | -0.161 | -.697* | .831**  | -0.376 | -0.312 | -0.498 | -.598*  | 0.416  | -0.443 | -0.308 |
| Carbon fixation pathways in prokaryotes     | .580*  | -0.14  | -0.004  | 0.279   | -.653*  | 0.138  | -0.425  | -.621* | -0.414 | -.691* | 0.287   | -0.263 | -.623* | -0.277 | -.743** | -0.065 | -0.573 | 0.331  |
| ABC transporters                            | -0.552 | -0.289 | -0.048  | -0.006  | .722**  | -0.319 | 0.43    | .623*  | 0.446  | .787** | -0.529  | 0.225  | .689*  | 0.226  | .757**  | 0.043  | .634*  | -0.195 |
| One carbon pool by folate                   | -0.248 | 0.091  | .752**  | -.719** | -.692*  | .788** | -.622*  | -0.321 | 0.143  | -0.421 | .867**  | -0.158 | -0.038 | -0.536 | -0.421  | 0.447  | -0.125 | -0.575 |
| Cyanoamino acid metabolism                  | 0.028  | 0.014  | -.683*  | .722**  | 0.555   | -.596* | 0.528   | 0.239  | 0.146  | 0.361  | -.877** | 0.283  | 0.01   | 0.479  | 0.27    | -0.306 | 0.182  | 0.541  |

A value greater than zero represents a positive correlation, a value less than zero represents a negative correlation. The significant correlations are presented as asterisks (\*,  $p < 0.05$ ; \*\*,  $p < 0.01$ ).

**Table S11.** The Pearson’s correlation analysis between soil bacterial genera and key metabolic pathways related to the N cycle

|                                             | RB41 | Spingomonas | H16   | Acidobacteria_bacterium_WX27 | Skermanella | Lysobacter | Steroidobacter | Acidibacter | Gaiella | Bacillus | AKYG587 | Nocardioides | Nitrospira | Pseudarthrobacter | CandidatusEntotheonella | Haliangium | Streptomyces | DS-100 |
|---------------------------------------------|------|-------------|-------|------------------------------|-------------|------------|----------------|-------------|---------|----------|---------|--------------|------------|-------------------|-------------------------|------------|--------------|--------|
| Alanine, aspartate and glutamate metabolism | .324 | -.260       | .503  | -.336                        | -.738**     | .464       | -.709**        | -.562       | -.276   | -.652*   | .702*   | -.323        | -.331      | -.452             | -.563                   | .279       | -.381        | -.205  |
| Glycine, serine and threonine metabolism    | .524 | -.522       | -.077 | .413                         | -.284       | -.128      | -.318          | -.354       | -.228   | -.412    | -.186   | -.258        | -.370      | .018              | -.348                   | .076       | -.385        | .419   |

|                                           |        |        |        |         |         |        |         |         |        |        |         |       |        |        |         |        |         |        |
|-------------------------------------------|--------|--------|--------|---------|---------|--------|---------|---------|--------|--------|---------|-------|--------|--------|---------|--------|---------|--------|
| Cysteine and methionine metabolism        | .784** | -.148  | -.141  | .381    | -.275   | -.057  | -.058   | -.245   | -.654* | -.513  | .143    | -.545 | -.463  | -.089  | -.357   | -.244  | -.764** | .303   |
| Arginine and proline metabolism           | -.032  | -.312  | -.513  | .553    | .760**  | -.660* | .623*   | .491    | .034   | .582*  | -.842** | .063  | .296   | .421   | .604*   | -.248  | .241    | .351   |
| Histidine metabolism                      | .634*  | -.342  | -.193  | .531    | -.413   | -.037  | -.169   | -.421   | -.482  | -.542  | -.007   | -.366 | -.573  | -.214  | -.528   | -.154  | -.663*  | .365   |
| Tyrosine metabolism                       | .146   | .389   | -.702* | .494    | .766**  | -.612* | .789**  | .523    | -.098  | .511   | -.764** | .204  | .143   | .661*  | .543    | -.552  | .146    | .467   |
| Phenylalanine metabolism                  | -.249  | .178   | -.468  | .294    | .799**  | -.538  | .624*   | .551    | .286   | .679*  | -.767** | .358  | .403   | .593*  | .650*   | -.247  | .504    | .269   |
| Tryptophan metabolism                     | -.252  | .232   | -.523  | .339    | .747**  | -.471  | .663*   | .525    | .279   | .689*  | -.790** | .472  | .353   | .516   | .593*   | -.383  | .522    | .214   |
| Pentose phosphate pathway                 | .559   | -.546  | -.205  | .453    | -.339   | -.115  | -.214   | -.418   | -.427  | -.470  | .039    | -.238 | -.515  | -.341  | -.431   | -.088  | -.538   | .097   |
| C5-Branched dibasic acid metabolism       | -.340  | -.640* | .689*  | -.358   | -.547   | .469   | -.680*  | -.345   | .335   | -.258  | .487    | -.138 | .095   | -.604* | -.359   | .592*  | .077    | -.418  |
| Nitrogen metabolism                       | .433   | -.092  | -.610* | .738**  | .666*   | -.570  | .781**  | .527    | -.371  | .390   | -.751** | -.224 | .113   | .416   | .478    | -.636* | -.216   | .435   |
| One carbon pool by folate                 | -.248  | .091   | .752** | -.719** | -.692*  | .788** | -.622*  | -.321   | .143   | -.421  | .867**  | -.158 | -.038  | -.536  | -.421   | .447   | -.125   | -.575  |
| Nicotinate and nicotinamide metabolism    | .340   | -.365  | .033   | .298    | -.712** | .185   | -.561   | -.732** | -.159  | -.657* | .196    | -.075 | -.605* | -.403  | -.784** | .124   | -.377   | .215   |
| Taurine and hypotaurine metabolism        | .680*  | .012   | -.595* | .732**  | .329    | -.512  | .436    | .135    | -.454  | -.068  | -.591*  | -.290 | -.264  | .497   | .099    | -.423  | -.458   | .724** |
| Selenocompound metabolism                 | .774** | -.010  | -.524  | .657*   | -.227   | -.328  | -.013   | -.424   | -.556  | -.504  | -.182   | -.172 | -.690* | .113   | -.481   | -.319  | -.595*  | .658*  |
| Cyanoamino acid metabolism                | .028   | .014   | -.683* | .722**  | .555    | -.596* | .528    | .239    | .146   | .361   | -.877** | .283  | .010   | .479   | .270    | -.306  | .182    | .541   |
| D-Glutamine and D-glutamate metabolism    | .037   | .056   | .645*  | -.642*  | -.805** | .620*  | -.801** | -.542   | -.028  | -.562  | .848**  | -.091 | -.231  | -.434  | -.590*  | .375   | -.148   | -.350  |
| Purine metabolism                         | .081   | -.244  | .590*  | -.454   | -.792** | .578*  | -.766** | -.603*  | -.115  | -.620* | .798**  | -.218 | -.287  | -.589* | -.586*  | .405   | -.254   | -.380  |
| Two-component system                      | -.486  | .101   | .215   | -.293   | .645*   | .036   | .553    | .832**  | .238   | .715** | -.205   | -.152 | .772** | .224   | .819**  | -.034  | .329    | -.323  |
| Chloroalkane and chloroalkene degradation | -.336  | .026   | -.338  | .236    | .856**  | -.416  | .703*   | .714**  | .307   | .767** | -.738** | .228  | .557   | .467   | .792**  | -.230  | .468    | .053   |
| Aminobenzoate degradation                 | -.453  | .105   | -.312  | .095    | .676*   | -.401  | .458    | .465    | .429   | .689*  | -.654*  | .492  | .442   | .455   | .604*   | -.096  | .669*   | .099   |
| Atrazine degradation                      | -.421  | -.189  | -.186  | .062    | .784**  | -.462  | .476    | .580*   | .324   | .706*  | -.580*  | .169  | .570   | .397   | .768**  | .060   | .543    | .015   |

A value greater than zero represents a positive correlation, a value less than zero represents a negative correlation. The significant correlations are presented as asterisks (\*,  $p < 0.05$ ; \*\*,  $p < 0.01$ ).

**Table S12.** The Pearson’s correlation analysis between soil bacterial genera and key metabolic pathways related to the P cycle

|                                             | RB41   | Sphingomonas | H16     | Acidobacteria_bacterium_WX27 | Skermanella | Lysobacter | Steroidobacter | Acidibacter | Gaiella | Bacillus | AKYG587 | Nocardioides | Nitrospira | Pseudarthrobacter | Candidatus | Entotheonella | Haliangium | Streptomyces | DS-100 |
|---------------------------------------------|--------|--------------|---------|------------------------------|-------------|------------|----------------|-------------|---------|----------|---------|--------------|------------|-------------------|------------|---------------|------------|--------------|--------|
| Glycine, serine and threonine metabolism    | .524   | -.522        | -.077   | .413                         | -.284       | -.128      | -.318          | -.354       | -.228   | -.412    | -.186   | -.258        | -.370      | .018              | -.348      | .076          | -.385      | .419         |        |
| Cysteine and methionine metabolism          | .784** | -.148        | -.141   | .381                         | -.275       | -.057      | -.058          | -.245       | -.654*  | -.513    | .143    | -.545        | -.463      | -.089             | -.357      | -.244         | -.764**    | .303         |        |
| Histidine metabolism                        | .634*  | -.342        | -.193   | .531                         | -.413       | -.037      | -.169          | -.421       | -.482   | -.542    | -.007   | -.366        | -.573      | -.214             | -.528      | -.154         | -.663*     | .365         |        |
| Streptomycin biosynthesis                   | .442   | -.303        | .265    | -.115                        | -.751**     | .269       | -.715**        | -.706*      | -.337   | -.742**  | .569    | -.247        | -.544      | -.409             | -.684*     | .261          | -.455      | -.026        |        |
| Glycolysis / Gluconeogenesis                | -.634* | .118         | .290    | -.530                        | .336        | .133       | .066           | .408        | .543    | .580*    | .009    | .429         | .641*      | .045              | .503       | .106          | .724**     | -.583*       |        |
| Fructose and mannose metabolism             | .728** | -.155        | -.524   | .664*                        | -.196       | -.374      | -.012          | -.432       | -.569   | -.472    | -.201   | -.184        | -.670*     | .060              | -.435      | -.268         | -.557      | .633*        |        |
| Galactose metabolism                        | .856** | .219         | -.710** | .598*                        | -.032       | -.485      | .150           | -.331       | -.687*  | -.323    | -.191   | .054         | -.636*     | .210              | -.306      | -.604*        | -.423      | .531         |        |
| Starch and sucrose metabolism               | .133   | .287         | -.338   | -.039                        | .641*       | -.407      | .497           | .555        | -.146   | .552     | -.348   | .203         | .321       | .458              | .640*      | -.441         | .239       | -.125        |        |
| Amino sugar and nucleotide sugar metabolism | .853** | -.058        | -.426   | .505                         | -.273       | -.298      | -.094          | -.452       | -.688*  | -.542    | -.003   | -.238        | -.676*     | .038              | -.465      | -.316         | -.619*     | .530         |        |
| Inositol phosphate metabolism               | -.276  | .228         | -.456   | .102                         | .658*       | -.490      | .461           | .414        | .269    | .695*    | -.586*  | .631*        | .343       | .421              | .551       | -.322         | .657*      | -.017        |        |
| Pyruvate metabolism                         | -.610* | -.143        | .262    | -.378                        | .607*       | -.039      | .317           | .685*       | .450    | .783**   | -.210   | .177         | .839**     | .129              | .781**     | .056          | .674*      | -.467        |        |
| Glyoxylate and dicarboxylate metabolism     | -.411  | -.233        | -.240   | .355                         | .677*       | -.381      | .529           | .568        | .422    | .676*    | -.790** | .152         | .501       | .358              | .590*      | -.055         | .436       | .205         |        |
| Oxidative phosphorylation                   | .158   | -.119        | .439    | -.001                        | -.790**     | .641*      | -.462          | -.418       | -.078   | -.616*   | .498    | -.417        | -.347      | -.541             | -.717**    | .155          | -.581*     | -.077        |        |
| Methane metabolism                          | -.708* | -.111        | .195    | -.271                        | .617*       | -.037      | .355           | .662*       | .558    | .770**   | -.310   | .203         | .795**     | .152              | .751**     | .127          | .668*      | -.400        |        |
| Carbon fixation in photosynthetic organisms | .198   | -.146        | .601*   | -.445                        | -.785**     | .581*      | -.735**        | -.530       | -.161   | -.697*   | .831**  | -.376        | -.312      | -.498             | -.598*     | .416          | -.443      | -.308        |        |
| RNA degradation                             | -.360  | .060         | .555    | -.324                        | -.623*      | .802**     | -.237          | -.135       | .124    | -.302    | .632*   | -.304        | -.076      | -.709**           | -.445      | .239          | -.359      | -.506        |        |
| Lipopolysaccharide biosynthesis             | .575   | -.299        | .143    | .181                         | -.470       | .176       | -.268          | -.364       | -.535   | -.627*   | .359    | -.643*       | -.431      | -.289             | -.453      | .049          | -.743**    | .183         |        |
| Glycerolipid metabolism                     | .038   | .051         | -.359   | .086                         | .662*       | -.306      | .683*          | .605*       | -.244   | .604*    | -.381   | .119         | .337       | .182              | .706*      | -.541         | .180       | -.266        |        |
| Glycerophospholipid metabolism              | .284   | -.508        | .423    | .064                         | -.496       | .488       | -.305          | -.187       | -.210   | -.421    | .232    | -.545        | -.136      | -.410             | -.327      | .090          | -.514      | -.080        |        |
| Arachidonic acid metabolism                 | .498   | .615*        | -.652*  | .439                         | .535        | -.516      | .563           | .277        | -.276   | .179     | -.490   | .142         | -.064      | .697*             | .284       | -.623*        | -.047      | .527         |        |
| Sphingolipid metabolism                     | -.393  | .079         | .063    | .001                         | .460        | .232       | .696*          | .788**      | .162    | .566     | -.193   | -.160        | .539       | -.136             | .571       | -.301         | -.003      | -.509        |        |
| ABC transporters                            | -.552  | -.289        | -.048   | -.006                        | .722**      | -.319      | .430           | .623*       | .446    | .787**   | -.529   | .225         | .689*      | .226              | .757**     | .043          | .634*      | -.195        |        |



|                                        |        |       |        |         |         |        |         |         |       |         |        |       |        |        |         |       |       |        |
|----------------------------------------|--------|-------|--------|---------|---------|--------|---------|---------|-------|---------|--------|-------|--------|--------|---------|-------|-------|--------|
| Phosphotransferase system (PTS)        | -.024  | .166  | .172   | -.350   | .477    | -.048  | .391    | .554    | -.280 | .415    | .056   | -.361 | .489   | .263   | .673*   | -.119 | .079  | -.164  |
| Bacterial secretion system             | -.272  | .031  | .783** | -.711** | -.520   | .755** | -.447   | -.138   | .076  | -.323   | .850** | -.353 | .105   | -.514  | -.225   | .442  | -.176 | -.590* |
| Riboflavin metabolism                  | -.512  | -.259 | .919** | -.735** | -.535   | .731** | -.693*  | -.205   | .465  | -.191   | .661*  | -.110 | .277   | -.477  | -.220   | .667* | .201  | -.591* |
| Vitamin B6 metabolism                  | .564   | -.156 | -.091  | .376    | -.671*  | .179   | -.384   | -.600*  | -.324 | -.669*  | .185   | -.119 | -.664* | -.343  | -.783** | -.159 | -.575 | .232   |
| Nicotinate and nicotinamide metabolism | .340   | -.365 | .033   | .298    | -.712** | .185   | -.561   | -.732** | -.159 | -.657*  | .196   | -.075 | -.605* | -.403  | -.784** | .124  | -.377 | .215   |
| Porphyrin and chlorophyll metabolism   | -.570  | -.042 | .093   | -.092   | .750**  | -.095  | .566    | .835**  | .476  | .839**  | -.478  | .087  | .837** | .282   | .841**  | -.067 | .546  | -.261  |
| Phosphonate and phosphinate metabolism | -.654* | .251  | -.035  | -.079   | .594*   | -.067  | .478    | .615*   | .585* | .719**  | -.419  | .353  | .626*  | .267   | .595*   | -.061 | .607* | -.201  |
| Purine metabolism                      | .081   | -.244 | .590*  | -.454   | -.792** | .578*  | -.766** | -.603*  | -.115 | -.620*  | .798** | -.218 | -.287  | -.589* | -.586*  | .405  | -.254 | -.380  |
| Pyrimidine metabolism                  | .369   | -.108 | .345   | -.121   | -.817** | .478   | -.612*  | -.623*  | -.303 | -.743** | .655*  | -.318 | -.505  | -.502  | -.743** | .155  | -.547 | -.093  |
| Two-component system                   | -.486  | .101  | .215   | -.293   | .645*   | .036   | .553    | .832**  | .238  | .715**  | -.205  | -.152 | .772** | .224   | .819**  | -.034 | .329  | -.323  |
| mRNA surveillance pathway              | .138   | .432  | -.372  | .222    | .461    | -.584* | .249    | .183    | .077  | .305    | -.252  | .256  | .176   | .518   | .174    | -.309 | .304  | .367   |
| Peroxisome                             | -.415  | .254  | -.262  | .080    | .774**  | -.318  | .639*   | .678*   | .370  | .792**  | -.626* | .367  | .587*  | .477   | .724**  | -.278 | .600* | .022   |
| Aminobenzoate degradation              | -.453  | .105  | -.312  | .095    | .676*   | -.401  | .458    | .465    | .429  | .689*   | -.654* | .492  | .442   | .455   | .604*   | -.096 | .669* | .099   |

A value greater than zero represents a positive correlation, a value less than zero represents a negative correlation. The significant correlations are presented as asterisks (\*,  $p < 0.05$ ; \*\*,  $p < 0.01$ ).

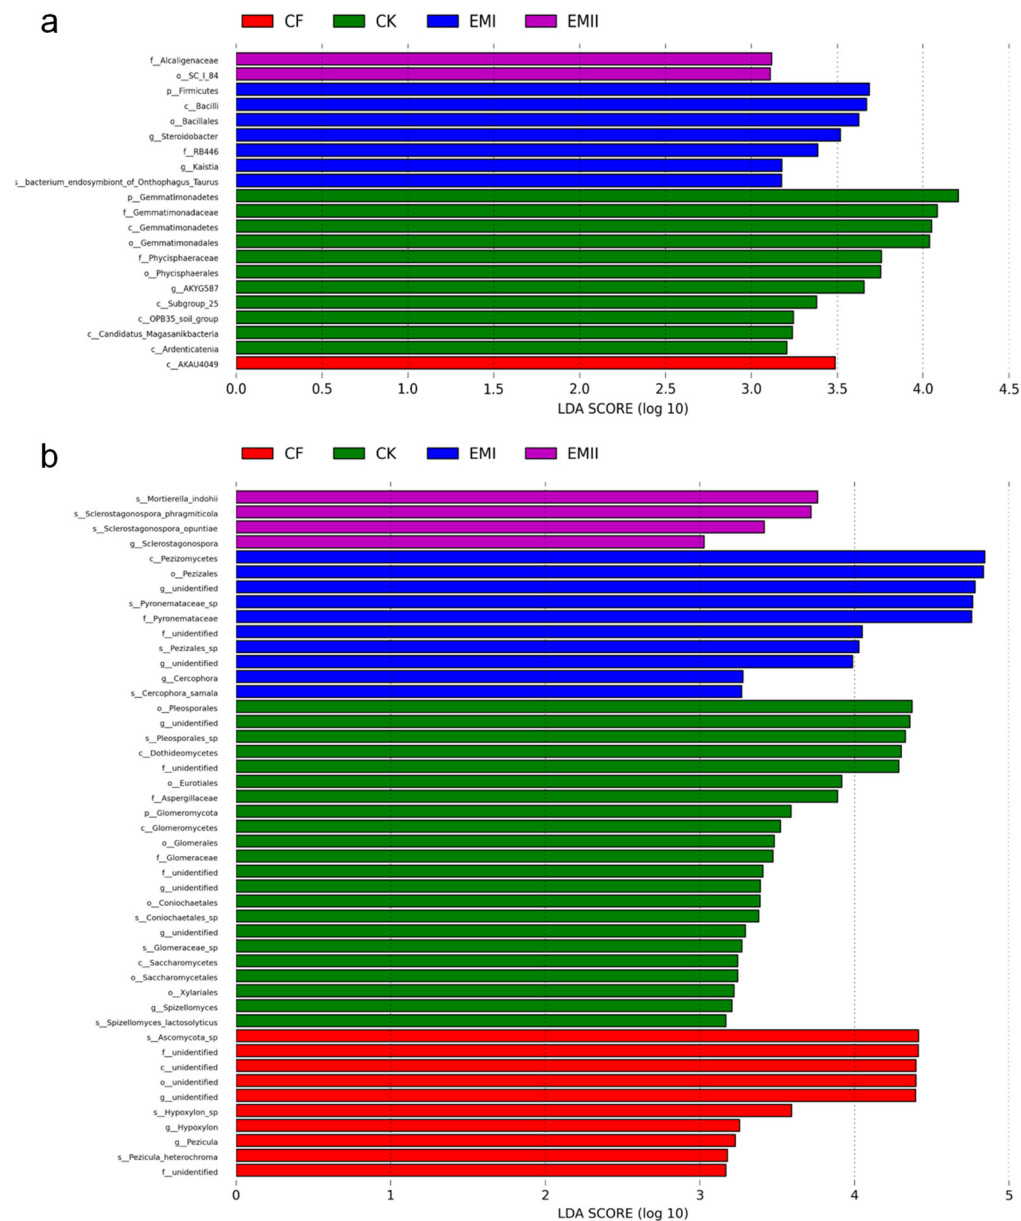

**Figure S1.** The linear discriminant analysis (LDA) effect size (LEfSe) of soil bacterial (a) and fungal (b) biomarkers under different fertilization treatments. Identified phylotype biomarkers were ranked by effect size ( $> 3$ ), and the  $\alpha$  value was  $< 0.05$ .

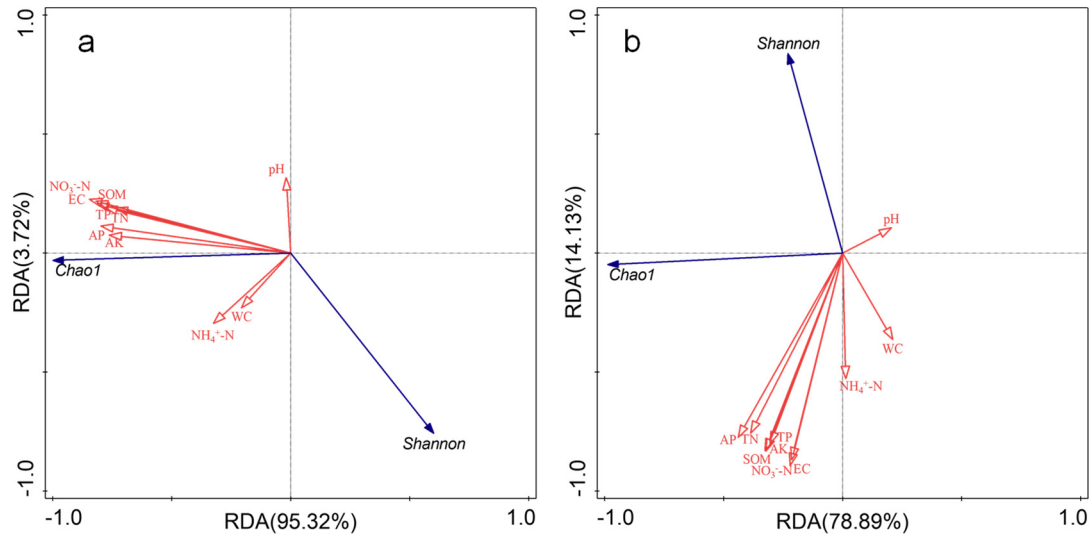

**Figure S2.** Redundancy analysis (RDA) between soil bacterial (a) and fungal (b) alpha-diversity and soil properties under different fertilization treatments. Red arrows represent soil properties; blue arrows represent alpha-diversity.

### Spearman's correlation analysis

Spearman's correlation analysis was used to evaluate the relationship between soil properties and the relative abundance of soil bacteria and fungi at the phylum and genus level (Figures S3 and S4). The relative abundances of bacterial dominant taxa had a good correlation with soil properties. For instance, soil EC, SOM, TP, TN,  $\text{NO}_3^-$ -N, AP, and AK were positively correlated with the relative abundance of Firmicutes, Bacteroidetes, and Tectomicrobia, and negatively correlated with that of Gemmatimonadetes, Planctomycetes, Nitrospirae, and Latescibacteria (Figure S3a). However, the fungal dominant phyla were only significantly correlated with a few soil properties. The relative abundance of Ascomycota was positively correlated with soil TP, TN, and AP, and that of Mortierellomycota was negatively correlated with soil pH (Figure S3b). Similarly, at the genus level, soil EC, SOM, TP, TN,  $\text{NO}_3^-$ -N, AP, and AK had a positive correlation with *Skermanella*, *Steroidobacter*, *Acidobacteria\_bacterium\_WX27* genus, and *Bacillus*, and a negative correlation with that of *H16*, *AKYG587*, *Lysobacter*, and *Halianhium* (Figure S4a). The relative abundances of *Gaiella* and *Nocardioides* within Actinobacteria was significantly positively correlated with pH and  $\text{NH}_4^+$ -N, respectively. In addition, the relative abundance of *Chrysosporium* showed a significantly positive relationship with EC, the relative abundance of *Mortierella* was significantly negatively correlated with pH; the relative abundance of *Stachybotrys*, *Fusicolla*, and *Xeromyces* was significantly negatively correlated with SOM and AK (Figure S4b). Therefore, bacteria were more sensitive to changes in soil properties than fungi.

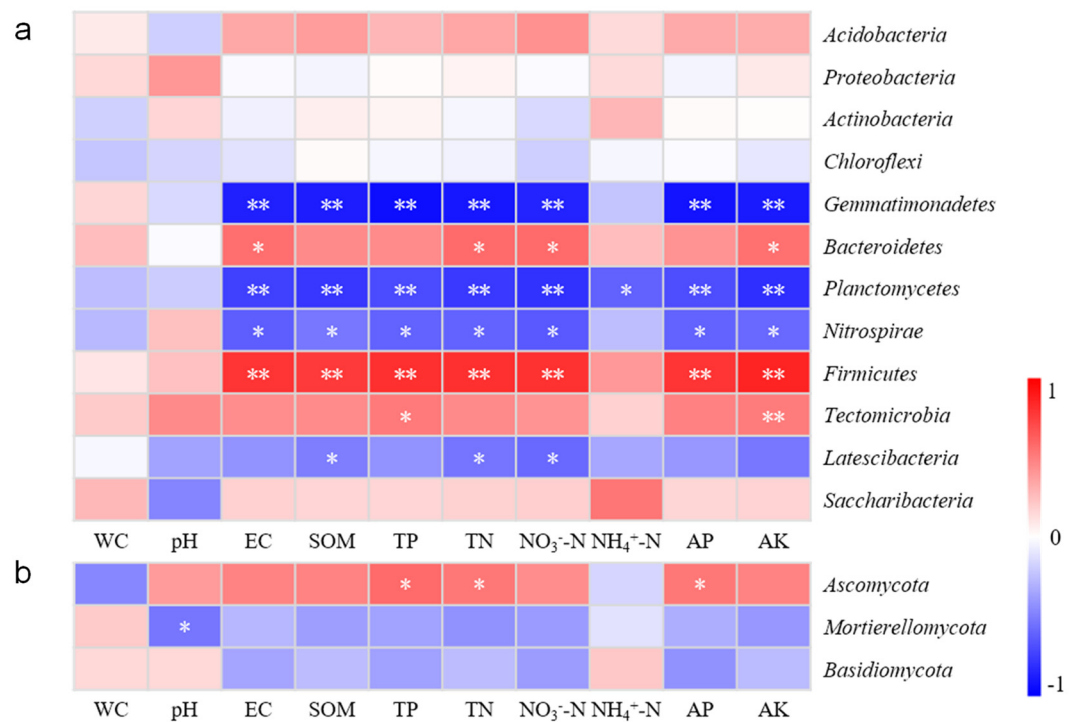

**Figure S3.** The heatmap of the correlation between soil properties and the relative abundance of bacterial (a) and fungal (b) phylum under different fertilization treatments (relative abundance > 1%). This heatmap was created according to the result of Spearman's correlation analysis. Positive relationships are represented in red, while negative relationships are represented in blue. The significant correlations are presented as asterisks (\*,  $p < 0.05$ ; \*\*,  $p < 0.01$ ).

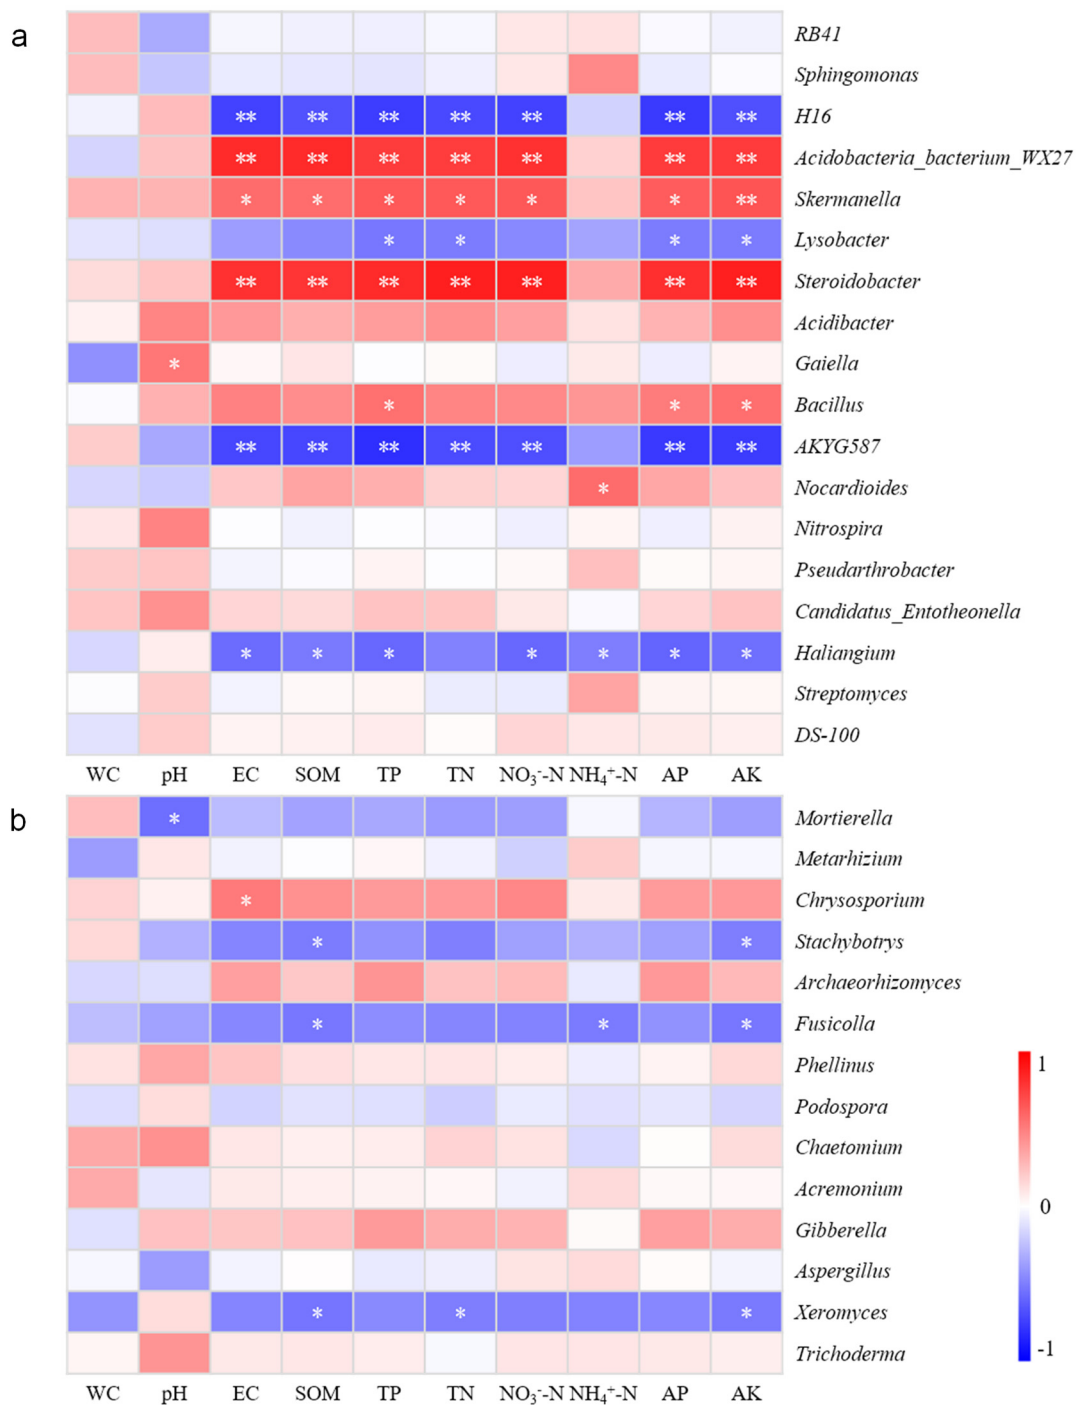

**Figure S4.** The heatmap of the correlation between soil properties and the relative abundance of bacterial (a) and fungal (b) genera under different fertilization treatments (relative abundance > 1%). This heatmap was created according to the result of Spearman's correlation analysis. Positive relationships are represented in red, while negative relationships are represented in blue. The significant correlations are presented as asterisks (\*,  $p < 0.05$ ; \*\*,  $p < 0.01$ ).

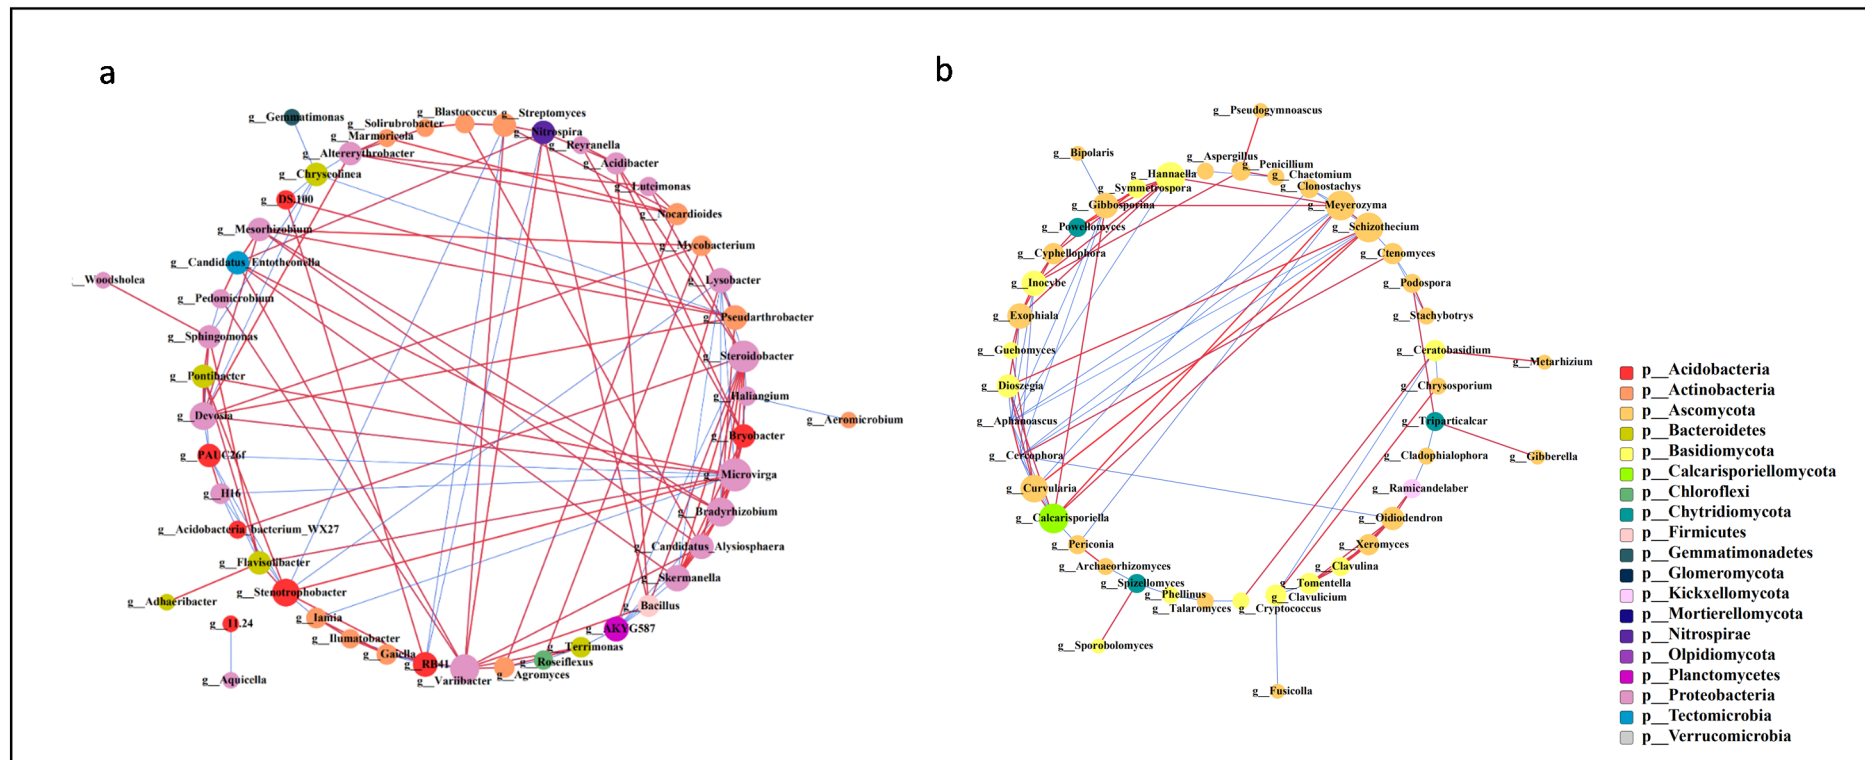

**Figure S5.** Network analysis showing overall bacterial (a) and fungal (b) co-occurrence. The co-occurring networks are colored by microbial taxonomic information at the phylum level. The red lines represent significantly positive ( $r > 0.6$ ) interrelationships, blue lines represent negative ( $r < -0.6$ ) interrelationships. The size of the node represents the abundance, and the width of the lines represents the strength of the correlation.

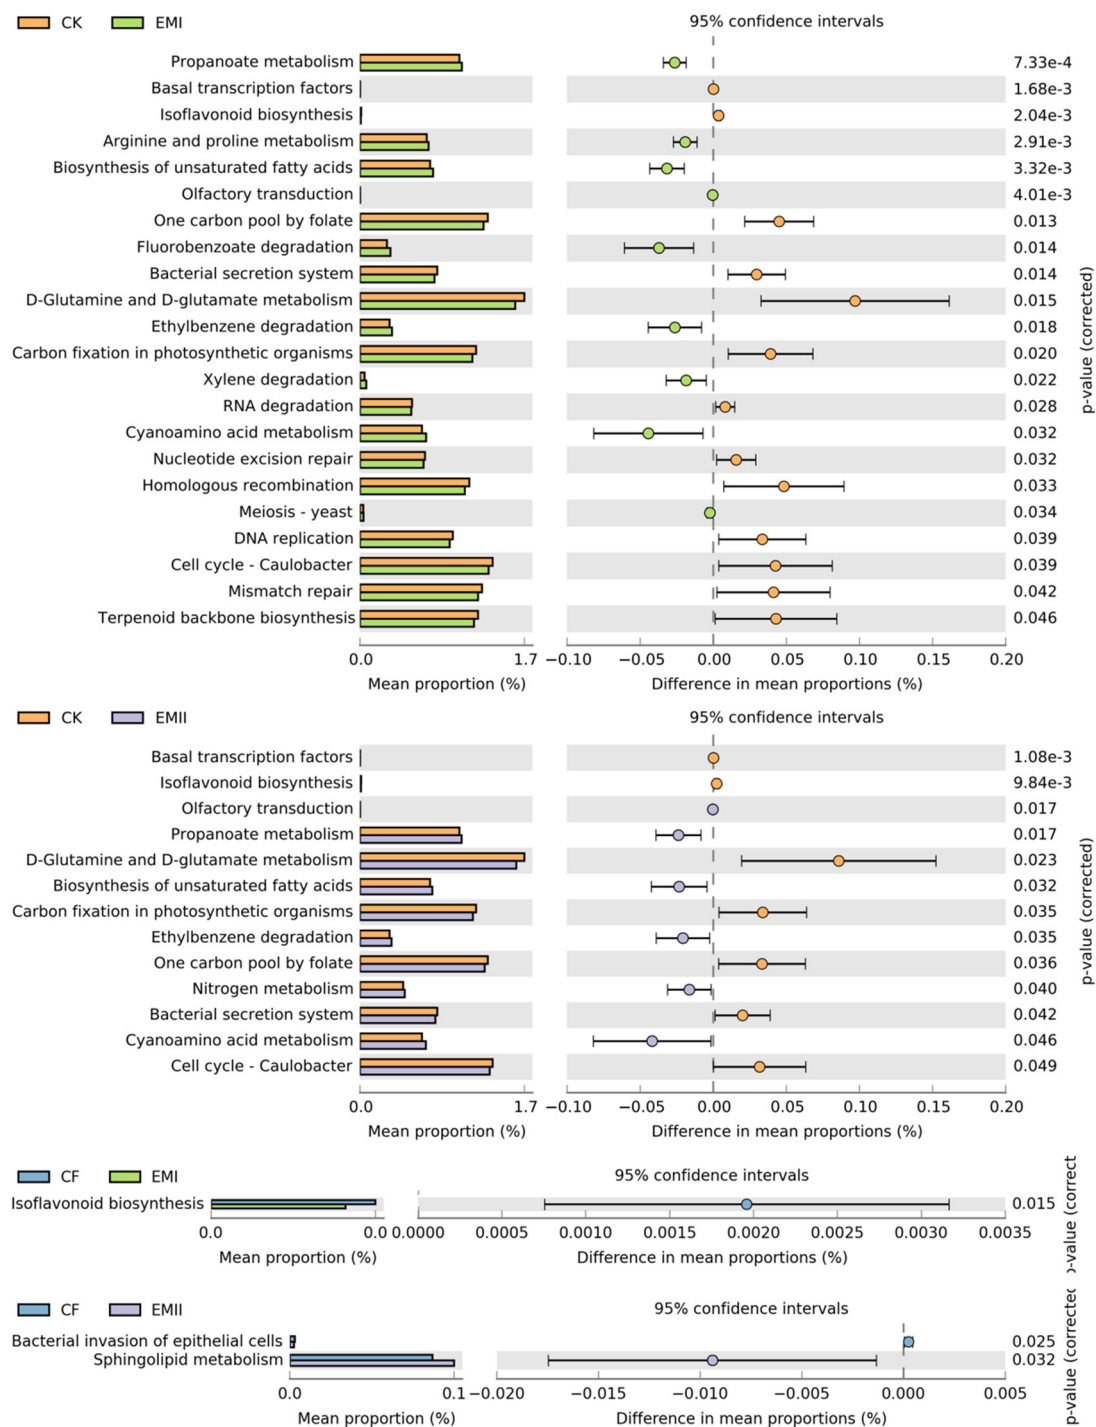

**Figure S6.** Extended error bar plots showing statistically significant differences in the bacterial functional groups between the fertilization treatments and the control treatment. Error bars indicate within-group standard deviations. Presented categories passed a corrected P value of < 0.05 in Welch's t test.

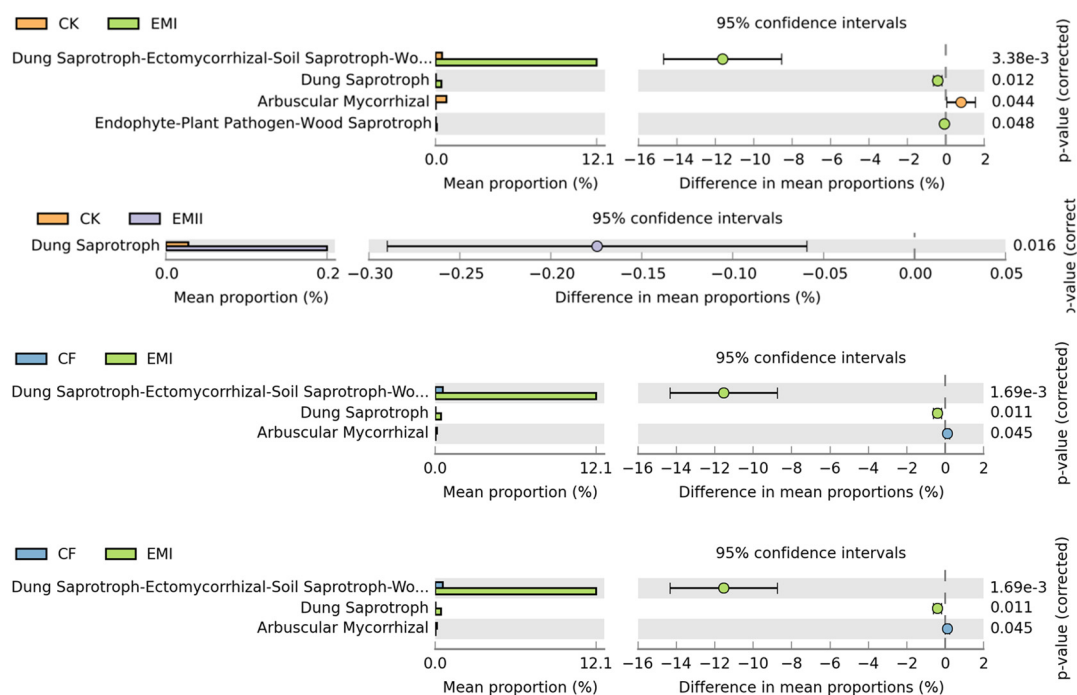

**Figure S7.** Extended error bar plots showing statistically significant differences in the fungal functional groups (guilds) between the fertilization treatments and the control treatment. Error bars indicate within-group standard deviations. Presented categories passed a corrected P value of  $< 0.05$  in Welch's t test.
